# Supplementary material for: Structure, electrical properties, and conduction mechanism of new germanate mixed Zn-doped In2Ge2O7 conductors
Source: Royal Society of Chemistry journal article supplement (doi:10.1039/d2qi00740a), 2022-01-01
Supplement: d2qi00740a1.pdf [file d2qi00740a1.pdf]

## Supporting information for

### Structure, Electrical Properties and Conduction Mechanism of New Germanate Mixed Conductors Zn-doped $\text{In}_2\text{Ge}_2\text{O}_7$

Xiaoling Zeng,<sup>a†</sup> Xiaohui Li,<sup>b,c,d†,\*</sup> Jungu Xu,<sup>a</sup> Xiaoge Wang,<sup>d</sup> Sihao Deng,<sup>e</sup> Lunhua He,<sup>e</sup> Junliang Sun<sup>d\*</sup>, Xiaojun Kuang,<sup>c,a</sup> and Xianran Xing<sup>b</sup>

<sup>a</sup> MOE Key Laboratory of New Processing Technology for Nonferrous Metal and Materials, Guangxi Key Laboratory of Optical and Electronic Materials and Devices, Guangxi Universities Key Laboratory of Nonferrous Metal Oxide Electronic Functional Materials and Devices, College of Materials Science and Engineering, Guilin University of Technology, Guilin 541004, People's Republic of China.

<sup>b</sup> Beijing Advanced Innovation Center for Materials Genome Engineering, Institute of Solid State Chemistry, University of Science and Technology Beijing, Beijing 100083, People's Republic of China. E-mail address: lixiaohuiftd@126.com.

<sup>c</sup> Guangxi Key Laboratory of Electrochemical and Magnetochemical Functional Materials, College of Chemistry and Bioengineering, Guilin University of Technology, Guilin 541004, People's Republic of China.

<sup>d</sup> College of Chemistry and Molecular Engineering, Peking University, Beijing National Laboratory for Molecular Science (BNLMS), Beijing 100871, People's Republic of China. E-mail address: junliang.sun@pku.edu.cn.

<sup>e</sup> Spallation Neutron Source Science Center, Dongguan 523803, People's Republic of China.

† These authors contributed equally.

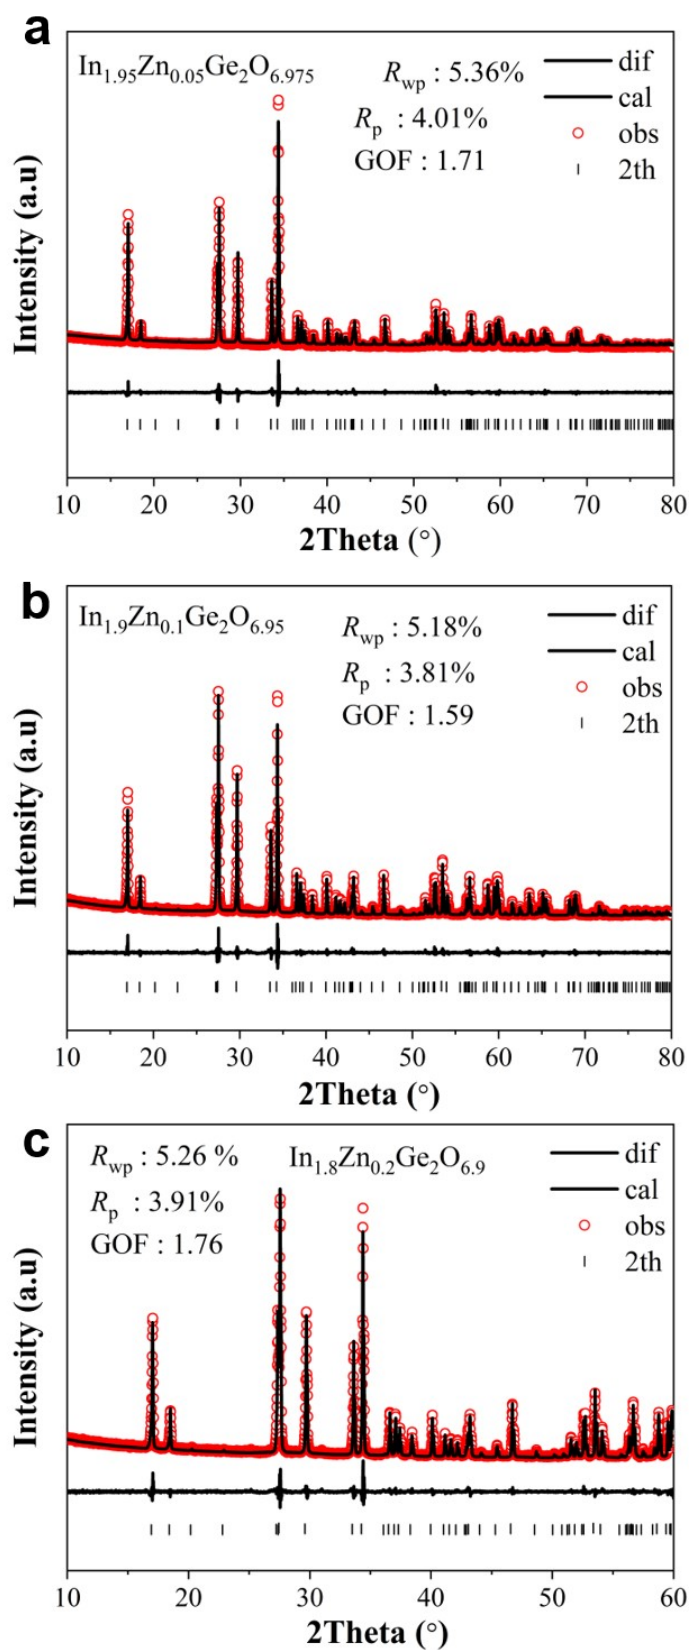

**Figure S1.** Rietveld refinement plots of  $\text{In}_{2-x}\text{Zn}_x\text{Ge}_2\text{O}_{7-0.5x}$  (a)  $x = 0.05$ ; (b)  $x = 0.10$ ; (c)

$x = 0.10$ .

**Table S1.** The final refined structural parameters of  $\text{In}_{1.95}\text{Zn}_{0.05}\text{Ge}_2\text{O}_{6.975}$ .

| Atom | Wyckoff | x          | y         | z         | occ.    | $B_{\text{iso}}$ ( $\text{\AA}^2$ ) |
|------|---------|------------|-----------|-----------|---------|-------------------------------------|
|      | site    |            |           |           |         |                                     |
| In1  | 4h      | 0          | 0.5       | 0.3070(1) | 0.98(2) | 2.18                                |
| Zn1  | 4h      | 0          | 0.5       | 0.3070(1) | 0.02(2) | 2.18                                |
| Ge1  | 4i      | 0.2328 (2) | 0.9105(4) | 0         | 1       | 2.79                                |
| O1   | 2a      | 0          | 0         | 0         | 0.98(3) | 2.99                                |
| O2   | 4i      | 0.401(1)   | 0.231(2)  | 0         | 1       | 0.98                                |
| O3   | 8j      | 0.2334(6)  | 0.722(1)  | 0.1612(7) | 1       | 2.99                                |

Space group:  $B2/m$ ,  $a = 6.66002(6)$   $\text{\AA}$ ,  $b = 8.78625(9)$   $\text{\AA}$ ,  $c = 4.92905(5)$   $\text{\AA}$ ,  $\alpha = 90^\circ$ ,  $\beta = 90^\circ$ ,  $\gamma = 102.4899(7)^\circ$ ,  $V = 281.605(5)$   $\text{\AA}^3$ .

**Table S2.** The final refined structural parameters of  $\text{In}_{1.9}\text{Zn}_{0.1}\text{Ge}_2\text{O}_{6.95}$ .

| Atom | Wyckoff | x         | y         | z          | occ.     | $B_{\text{iso}}$ ( $\text{\AA}^2$ ) |
|------|---------|-----------|-----------|------------|----------|-------------------------------------|
|      | site    |           |           |            |          |                                     |
| In1  | 4h      | 0         | 0.5       | 0.30714(9) | 0.951(8) | 1.32                                |
| Zn1  | 4h      | 0         | 0.5       | 0.30714(9) | 0.049(8) | 1.32                                |
| Ge1  | 4i      | 0.2336(2) | 0.9089(3) | 0          | 1        | 1.99                                |
| O1   | 2a      | 0         | 0         | 0          | 0.95(1)  | 2.98                                |
| O2   | 4i      | 0.416(1)  | 0.236(2)  | 0          | 1        | 1.67                                |
| O3   | 8j      | 0.2355(7) | 0.715(1)  | 0.1614(7)  | 1        | 2.98                                |

Space group:  $B2/m$ ,  $a = 6.65827(5) \text{ \AA}$ ,  $b = 8.78629(8) \text{ \AA}$ ,  $c = 4.92940(5) \text{ \AA}$ ,  $\alpha = 90^\circ$ ,  $\beta = 90^\circ$ ,  $\gamma = 102.4852(6)^\circ$ ,  $V = 281.558(4) \text{ \AA}^3$ .

**Table S3.** The final refined structural parameters of  $\text{In}_{1.85}\text{Zn}_{0.15}\text{Ge}_2\text{O}_{6.925}$ .

| Atom | Wyckoff site | x         | y         | z         | occ.    | $B_{\text{iso}} (\text{\AA}^2)$ |
|------|--------------|-----------|-----------|-----------|---------|---------------------------------|
| In1  | 4h           | 0         | 0.5       | 0.3073(1) | 0.93(1) | 1.41                            |
| Zn1  | 4h           | 0         | 0.5       | 0.3073(1) | 0.07(1) | 1.41                            |
| Ge1  | 4i           | 0.2336(3) | 0.9077(4) | 0         | 1       | 2.12                            |
| O1   | 2a           | 0         | 0         | 0         | 0.92(2) | 2.99                            |
| O2   | 4i           | 0.414(1)  | 0.225(2)  | 0         | 1       | 0.49                            |
| O3   | 8j           | 0.2372(9) | 0.722 (1) | 0.1602(8) | 1       | 2.99                            |

Space group:  $B2/m$ ,  $a = 6.65969(6) \text{ \AA}$ ,  $b = 8.78586(9) \text{ \AA}$ ,  $c = 4.92856(6) \text{ \AA}$ ,  $\alpha = 90^\circ$ ,  $\beta = 90^\circ$ ,  $\gamma = 102.4897(7)^\circ$ ,  $V = 281.551(5) \text{ \AA}^3$ .

**Table S4.** The final refined structural parameters of  $\text{In}_{1.8}\text{Zn}_{0.2}\text{Ge}_2\text{O}_{6.9}$ .\*

| Atom | Wyckoff site | x         | y         | z         | occ     | $B_{\text{iso}} (\text{\AA}^2)$ |
|------|--------------|-----------|-----------|-----------|---------|---------------------------------|
| In1  | 4h           | 0         | 0.5       | 0.3068(1) | 0.91(1) | 2.05                            |
| Zn1  | 4h           | 0         | 0.5       | 0.3068(1) | 0.09(1) | 1.64                            |
| Ge1  | 4i           | 0.2330(3) | 0.9092(4) | 0         | 1       | 3.00                            |
| O1   | 2a           | 0         | 0         | 0         | 0.91(1) | 3.00                            |
| O2   | 4i           | 0.424(2)  | 0.222(3)  | 0         | 1       | 3.00                            |

---

|    |    |            |          |           |   |      |
|----|----|------------|----------|-----------|---|------|
| O3 | 8j | 0.2338 (9) | 0.714(2) | 0.1652(9) | 1 | 3.00 |
|----|----|------------|----------|-----------|---|------|

---

\*Space group:  $B2/m$ ,  $a = 6.65986(7)\text{\AA}$ ,  $b = 8.7863(1)\text{\AA}$ ,  $c = 4.92892(6)\text{\AA}$ ,  $\alpha = 90^\circ$ ,  $\beta = 90^\circ$ ,  $\gamma = 102.4929(7)^\circ$ ,  $V = 281.590(5)\text{\AA}^3$ .

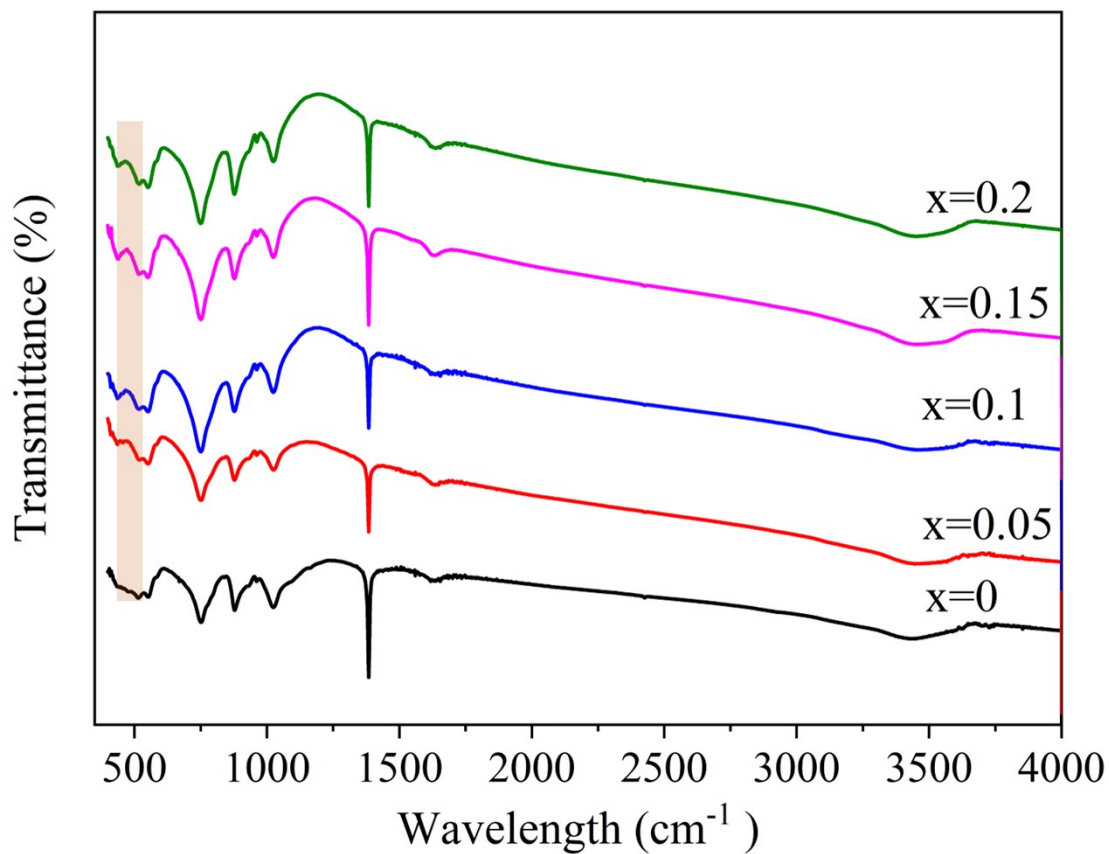

**Figure S2.** IR spectra of  $\text{In}_{2-x}\text{Zn}_x\text{Ge}_2\text{O}_{7-0.5x}$  ( $0 \leq x \leq 0.20$ ).

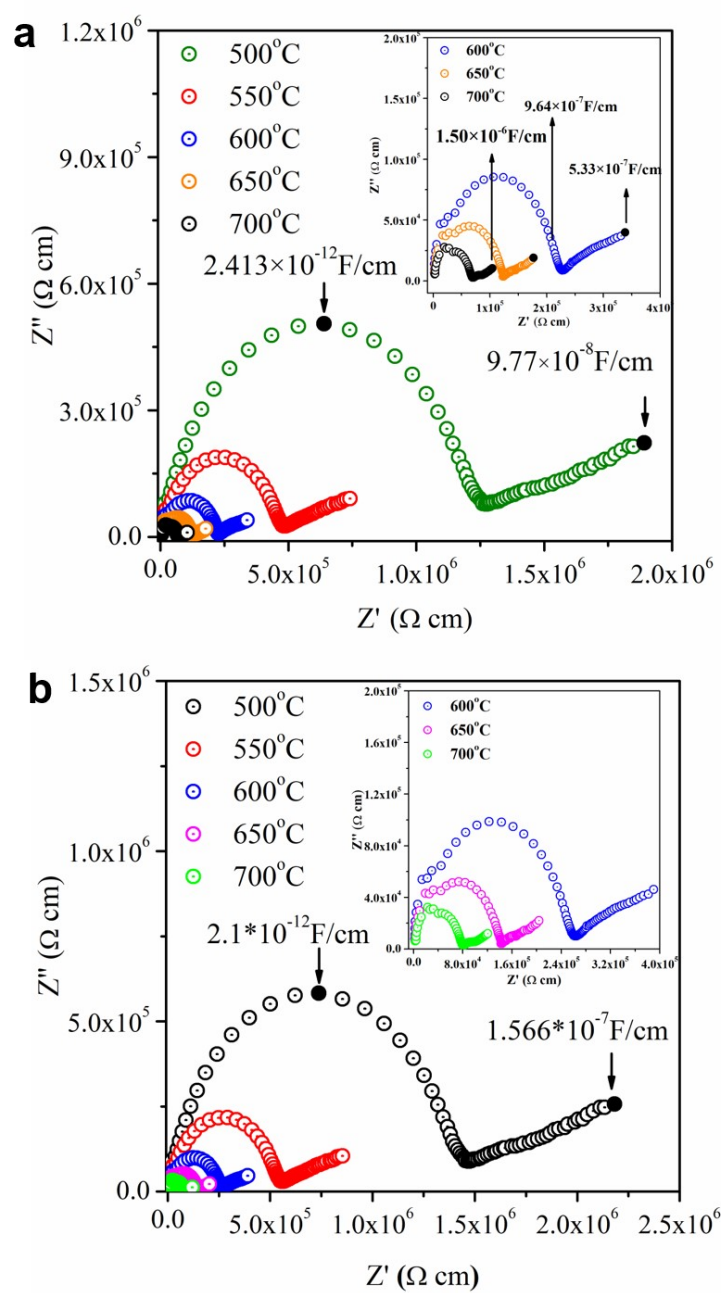

**Figure S3.** Complex impedance plots of (a)  $\text{In}_{2-x}\text{Zn}_x\text{Ge}_2\text{O}_{7-0.5x}$  ( $x = 0.05$ ) and (b)  $\text{In}_{2-x}\text{Zn}_x\text{Ge}_2\text{O}_{7-0.5x}$  ( $x = 0.10$ ) in the temperature range from 500 °C to 700 °C.

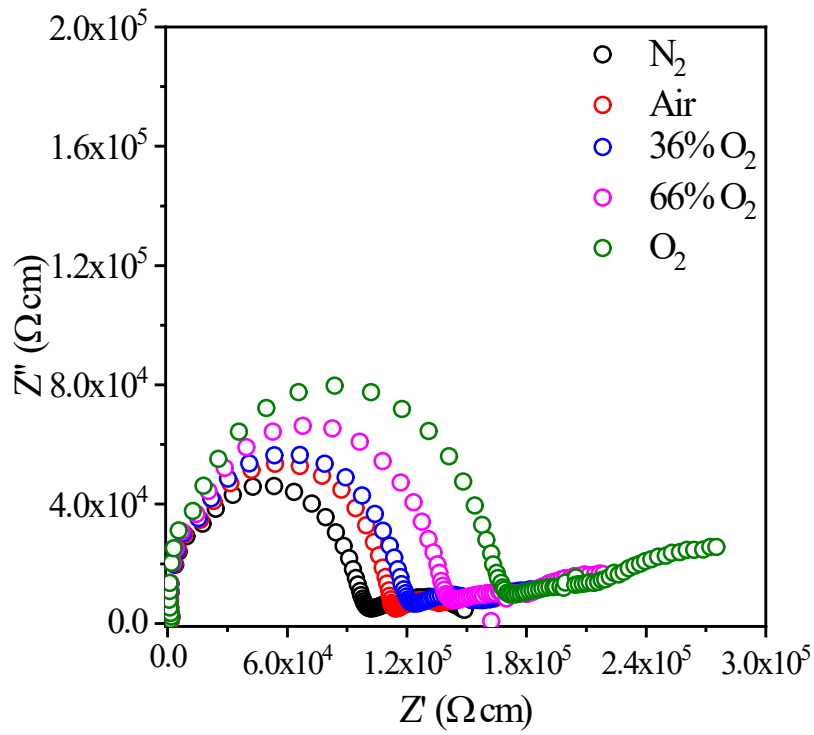

**Figure S4.** Complex impedance plots of  $\text{In}_{2-x}\text{Zn}_x\text{Ge}_2\text{O}_{7-0.5x}$  ( $x = 0.10$ ) at different oxygen partial pressures.

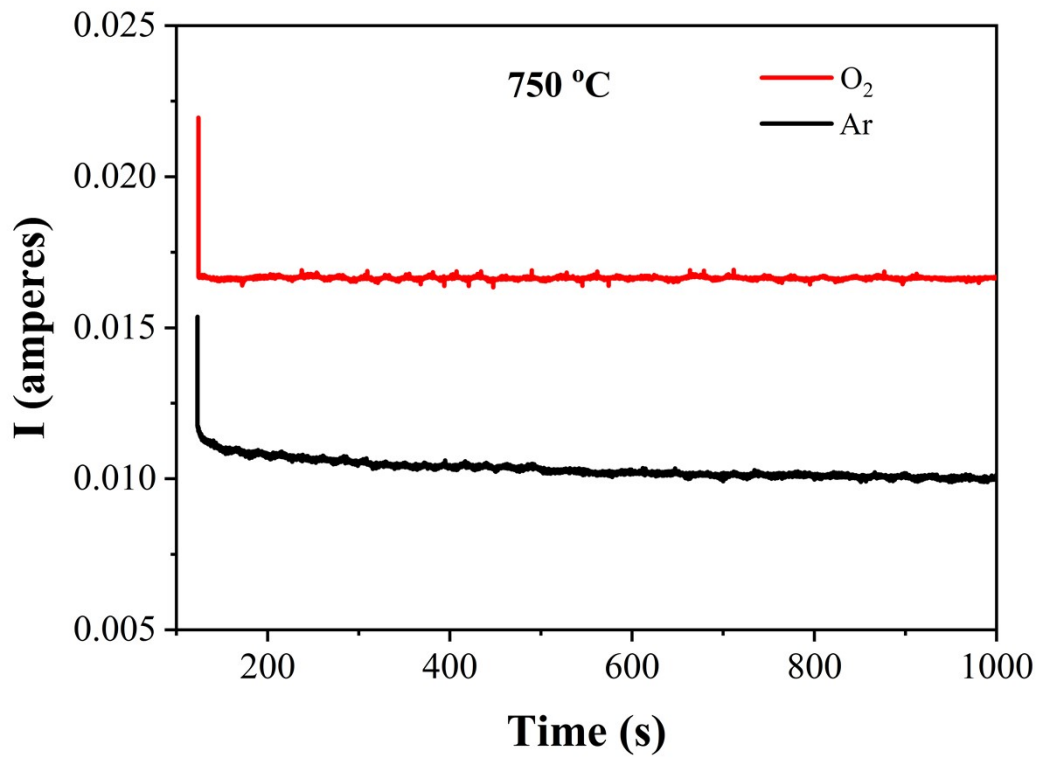

**Figure S5.** DC chronoamperometry curve of  $\text{In}_{2-x}\text{Zn}_x\text{Ge}_2\text{O}_{7-0.5x}$  ( $x = 0.2$ ) at  $750\text{ }^\circ\text{C}$ .



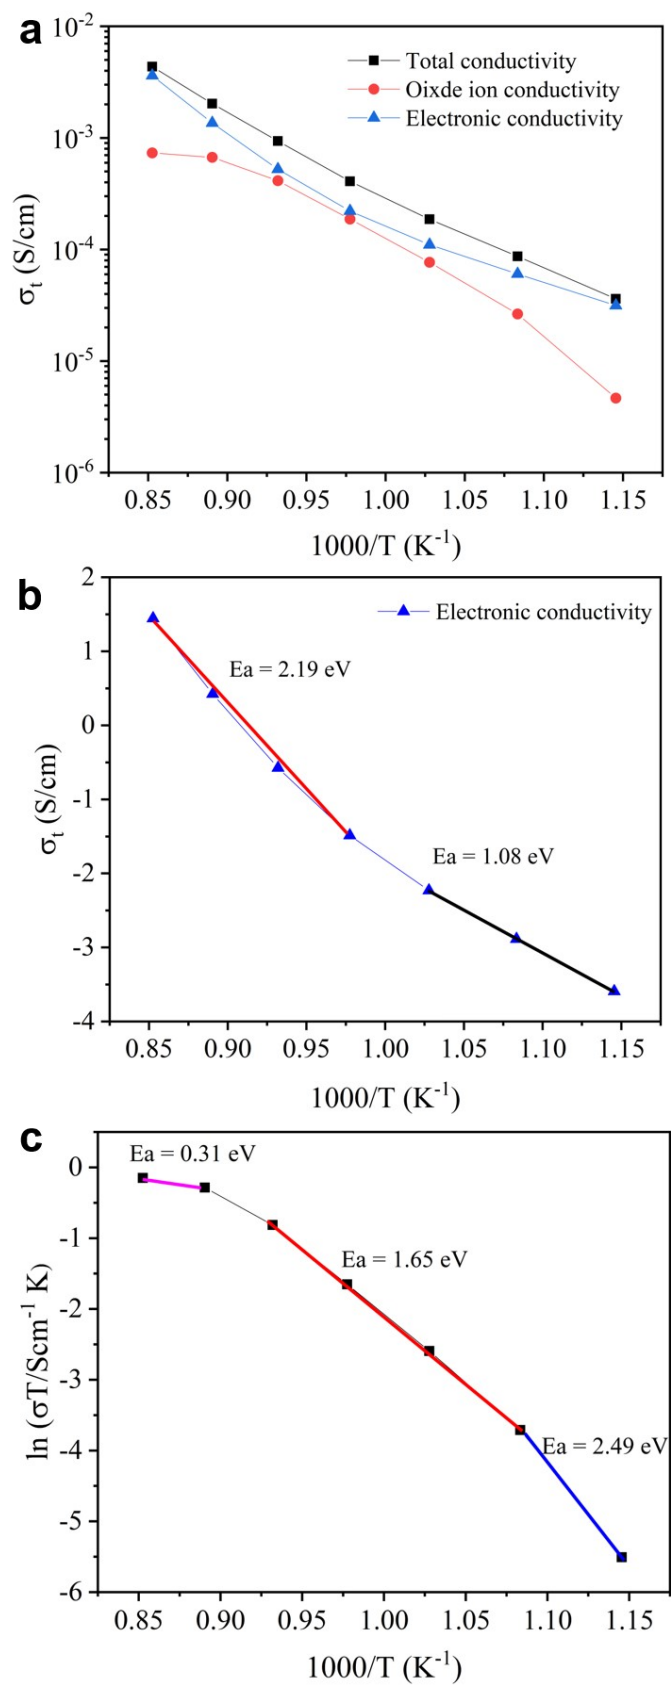

**Figure S6.** (a) Bulk conductivity, (b) extracted electronic conductivity and (c) oxide ionic conductivity of  $\text{In}_{2-x}\text{Zn}_x\text{Ge}_2\text{O}_{7-0.5x}$  ( $x = 0.2$ ).

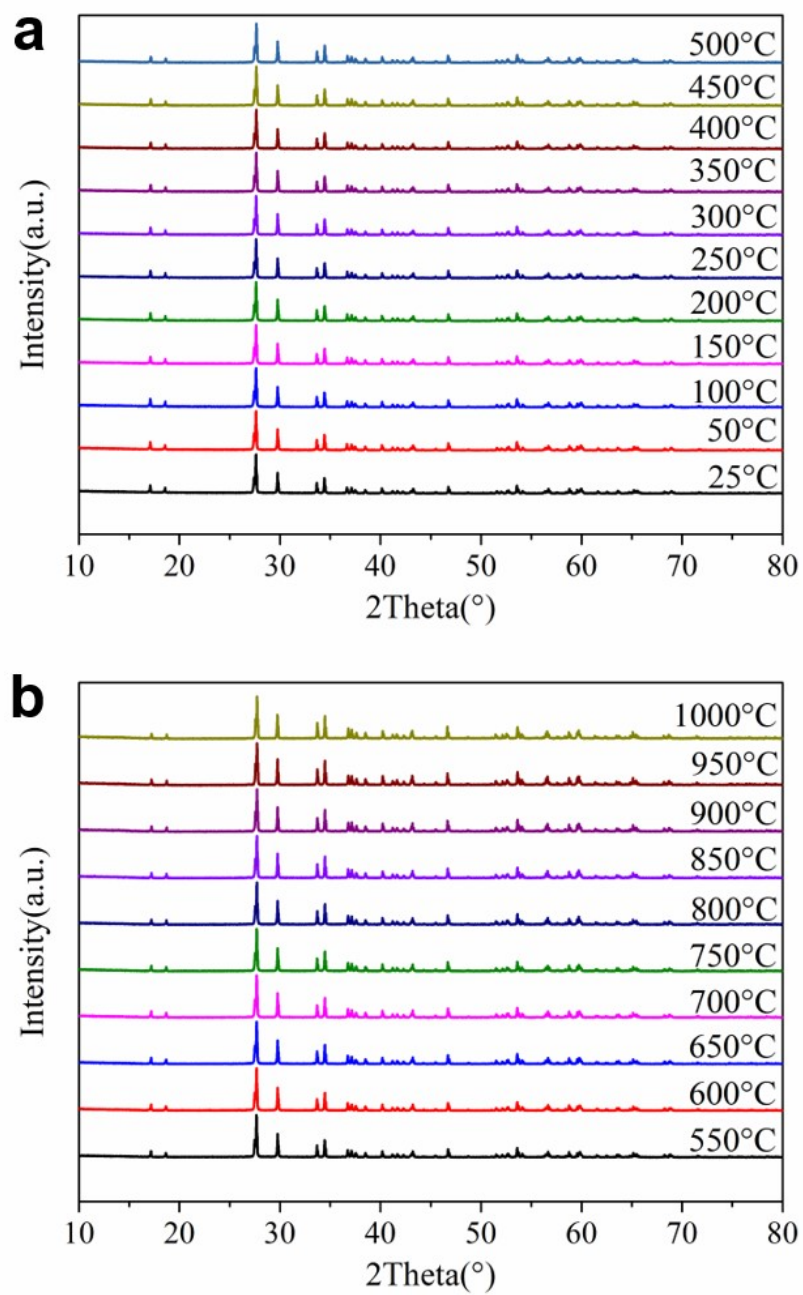

**Figure S7.** Variable temperature XRD patterns of  $\text{In}_{2-x}\text{Zn}_x\text{Ge}_2\text{O}_{7-0.5x}$  ( $x = 0.2$ ) in the temperature region of 25-1000 °C.
